1 **Title:** Adaptively introgressed Neandertal haplotype at the OAS locus functionally  
2 impacts innate immune responses in humans.

3

4 **Authors**

5 Aaron J. Sams<sup>1,\* †</sup> (as2847@cornell.edu)

6 Anne Dumaine<sup>2 †</sup> (dumaine.anne@gmail.com)

7 Yohann Nédélec<sup>2,3 †</sup> (yohann.nedelec@gmail.com)

8 Vania Yotova<sup>2</sup> (vania.g.yotova@gmail.com)

9 Carolina Alfieri<sup>2,4</sup> (carolina.alfieri@recherche-ste-justine.qc.ca)

10 Jerome E. Tanner<sup>2</sup> (jetanner@videotron.ca)

11 Philipp W. Messer<sup>1,\* ‡</sup> (messer@cornell.edu)

12 Luis B. Barreiro<sup>2,5,\* ‡</sup> (luis.barreiro@umontreal.ca)

13

14 **Affiliations**

15 <sup>1</sup>Department of Biological Statistics and Computational Biology, Cornell  
16 University, Ithaca, NY

17 <sup>2</sup>Department of Genetics, Sainte-Justine Hospital Research Centre, University of  
18 Montreal, Montreal, Qc, Canada

19 <sup>3</sup>Department of Biochemistry, University of Montreal, Montreal, Qc, Canada

20 <sup>4</sup>Department of Microbiology and Immunology, University of Montreal, Montreal,  
21 Qc, Canada

22 <sup>5</sup>Department of Pediatrics, University of Montreal, Montreal, Qc, Canada

23 <sup>†</sup>These authors contributed equally to this work

24 <sup>‡</sup>These authors jointly supervised this work

25 <sup>\*</sup>Corresponding author

26 **Abstract**

27 The 2'-5' oligoadenylate synthetase (OAS) locus encodes for three OAS enzymes  
28 (OAS1-3) involved in innate immune response. This region harbors high amounts  
29 of Neandertal ancestry in non-African populations; yet, strong evidence of positive  
30 selection in the OAS region is still lacking. Here we used a broad array of  
31 selection tests in concert with neutral coalescent simulations to firmly demonstrate  
32 a signal of adaptive introgression at the OAS locus. Furthermore, we characterized  
33 the functional consequences of the Neandertal haplotype in the transcriptional  
34 regulation of OAS genes at baseline and infected conditions. We found that cells  
35 from people with the Neandertal-like haplotype express lower levels of *OAS3*  
36 upon infection, as well as distinct isoforms of *OAS1* and *OAS2*. Notably, the  
37 Neandertal-introgressed haplotype reintroduced an ancestral splice variant of  
38 *OAS1* encoding a more active protein, suggesting that adaptive introgression  
39 occurred as a means to resurrect adaptive variation that had been lost outside  
40 Africa.

41 **Keywords:** Natural selection, introgression, innate immunity

42 **Background**

43 Whole genome sequencing of several archaic human genomes [1-5] representing  
44 Neandertals and an as yet geographically and paleontologically unknown  
45 population referred to as Denisovans has revealed gene flow between these  
46 populations and the ancestors of present-day humans. Neandertal ancestry makes  
47 up approximately 0.5-2 percent of the ancestry of most living humans, with higher

48 amounts of Neandertal ancestry found outside of Africa [6-8]. While it seems that  
49 there may have been widespread purifying selection against Neandertal ancestry in  
50 humans [6,8,9], some positive selection on Neandertal genes (adaptive  
51 introgression) has also been observed [10,11]. Neandertals and other archaic  
52 populations inhabited Eurasia for several hundred thousand years [12] and were  
53 likely well adapted to their environments. Therefore, some genetic variation  
54 inherited from these archaic humans may have been adaptive in modern humans,  
55 particularly across phenotypes that are strongly influenced by direct interactions  
56 with the surrounding environment [10], such as our immune response to infectious  
57 agents [13].

58 The OAS locus on chromosome 12, which harbors three genes (*OAS1*, *OAS2*,  
59 *OAS3*) encoding the 2'-5' oligoadenylate synthetase enzymes has received  
60 considerable attention due to its clear signatures of multiple archaic haplotypes in  
61 populations outside of Africa [14,15], and the critical role of OAS genes in the  
62 innate immune response to viruses [16]. Mendez and colleagues [17] first  
63 identified an introgressed haplotype of *OAS1* from Denisovans that is restricted to  
64 individuals in Indonesia and Melanesia. Later, these authors [15] identified a  
65 Neandertal haplotype at the OAS locus that spans a ~190 kilobase region between  
66 two surrounding recombination hotspots.

67 The elevated frequency of the Neandertal derived alleles in the OAS locus (Figure  
68 1) relative to average levels of Neandertal ancestry in Europeans [6], along with  
69 the key role OAS genes play in protective immunity against viral infections raises

70 the possibility that introgressed Neandertal haplotypes at OAS may have been  
71 adaptive in modern humans. While some studies provide suggestive evidence of  
72 adaptive introgression at the OAS locus [6,11], strong evidence of positive  
73 selection in the OAS region is still lacking. Indeed, several studies failed to reject  
74 a model of neutral evolution for the Neandertal haplotype when using standard  
75 neutrality tests [15,18].

76 We hypothesize that the overall lack of signals of selection in the OAS region  
77 stems from the low power of standard neutrality tests to detect adaptive  
78 introgression [19]. Here we circumvent this issue by testing the hypothesis of  
79 adaptive introgression using extensive neutral coalescent simulations specifically  
80 tailored to match the genomic features of the OAS region in combination with  
81 several empirical observations of Eurasian genetic variation, and ancient DNA  
82 data from Eurasia. We firmly demonstrate a population genetic signal of adaptive  
83 introgression at the OAS locus and characterize the functional consequences of the  
84 Neandertal haplotype in the transcriptional regulation of OAS genes in  
85 macrophages and peripheral blood mononuclear cells (PBMCs) at baseline and  
86 infected conditions. We note that the term ‘adaptive introgression’ will be used in  
87 a broad sense, as our tests do not allow us to determine the exact timing when  
88 selection started to act on the Neanderthal alleles.

## 89 **Results**

90 Mendez *et al.* [15] previously reported evidence of archaic introgression at the  
91 OAS locus. We first verified these results, using data from phase 3 of the 1000

92 Genomes Project [20], by examining the relationships of all modern human  
93 sequences at the OAS locus with the Altai Neandertal, Denisovan, and an inferred  
94 ancestral sequence. Clustering the human haplotypes resulted in 10 consensus  
95 sequences representing human haplotype clusters, which we combined with the  
96 archaic sequences in a neighbor-joining tree (Methods, Figure 1A, S1). This tree  
97 confirms that the Denisovan haplotype is not present in the population samples  
98 represented in the 1000 Genomes Project dataset. In contrast, the Neandertal  
99 haplotype is found at relatively high frequencies outside of Africa, reaching  
100 highest frequencies in European population samples (up to 43%, Figure 1B).  
101 Additionally, we corroborate the finding of Mendez and colleagues [15] that  
102 Neandertal-like haplotypes in the OAS region are too long to have resulted from  
103 incomplete lineage sorting (ILS) ( $P \leq 2 \times 10^{-3}$ , Methods).

104 To investigate the hypothesis of non-neutral evolution at the OAS locus we first  
105 tested whether the observed frequencies of Neandertal-like sites (NLS) in the OAS  
106 region are higher than expected under neutrality. We defined NLS as bi-allelic  
107 SNPs with derived alleles that are shared between Neandertals and a non-African  
108 population sample, but absent in a sub-Saharan African sample [6,21,22].  
109 Specifically, we simulated the expected allele frequency of NLS under neutrality,  
110 using a demographic model based on previously inferred parameters of human  
111 demographic history [23-25](Figure S1, Table S1). We considered both a model  
112 with a single pulse of Neandertal introgression occurring over a span of 500 years  
113 into the ancestral Eurasian population after their population split from Africa, and  
114 two additional two-pulse models (Figure S1, Table S1). We found that in all

115 European populations (with the exception of Finnish (FIN)), the highest frequency  
116 NLS fall in the extreme 1% of all simulations and are significantly elevated in  
117 frequency (all five European samples pass  $FDR < 0.05$ , see Table S2), regardless  
118 of whether we assume a single-pulse introgression model (Figure 2A) or two-pulse  
119 introgression models (Figure S3), indicating that the high frequencies of NLS  
120 found in most European populations likely reflects a history of adaptation.

121 We next sought to examine the consistency of the simulation results described  
122 above using genetic data from a dataset of 230 ancient Eurasian individuals [26].  
123 Assuming neutrality, the expected frequency of an allele in contemporary  
124 European populations can be predicted as a linear combination of allele  
125 frequencies sampled from representative ancient populations that have contributed  
126 ancestry to present-day European populations in different proportions [26,27]  
127 (Methods). Using this approach, we calculated the expected allele frequency in  
128 four present day European samples from the 1,000 Genomes Project [20] at the 11  
129 NLS falling within the bounds of the three OAS genes, based on the ancient allele  
130 frequencies estimated by Mathieson and colleagues. To set up our null  
131 expectations we performed a similar analysis on a dataset of approximately one  
132 million SNPs scattered around the genome, generated by Mathieson and  
133 colleagues (by merging 213 ancient samples dated between 6,500 and 300 BCE  
134 with sequencing data from four European samples from the 1,000 Genomes  
135 Project). We found that the NLS at OAS are outliers in the genome with respect to  
136 deviations from ancient frequencies. More specifically, we found that the allele  
137 frequencies of 6 out of the 11 OAS SNPs tested in the *OAS1-OAS3* region (those 6

138 SNPs fall within the block of SNPs with NLS frequency greater than 99% of  
139 neutral simulations) have increased above the frequency predicted by ancient  
140 Eurasian samples by more than 20%, significantly more than what we observed for  
141 other SNPs genome-wide with comparable present-day frequencies (lowest  $P =$   
142 0.00476, Figure 2B, Table S3). Our findings at this single locus are consistent with  
143 results from the genome-wide selection scan performed by Mathieson and  
144 colleagues [26] where the OAS region also showed evidence of selection ( $P < 10^{-7}$   
145 , Table S3), even if it did not reach genome-wide significance after multiple-test  
146 correction.

147 We next searched for additional evidence of recent selection, as measured by the  
148 iHS [28] and DIND [29] statistics. These tests share a similar rationale: an allele  
149 that has recently been driven to high population frequency by positive selection  
150 should be associated with unusually long-range LD (iHS) and reduced intra-allelic  
151 nucleotide diversity (DIND) [28-30]. We found that several NLS in the OAS  
152 region show significantly high iHS and DIND values with respect to genome-wide  
153 expectations (Figure 3A and S4), further supporting that they have been targeted  
154 by positive selection.

155 As an additional means of understanding whether or not Neandertal haplotypes at  
156 OAS are longer than would be expected if they had evolved neutrally, we followed  
157 up these empirical haplotype-based tests with a simulation approach using a  
158 simple test statistic,  $H_{D/A}$ . This statistic (fully defined in Methods) compares  
159 pairwise haplotype homozygosity lengths within the set of haplotypes carrying a

160 derived (Neandertal) allele and within those carrying the ancestral allele. We  
161 utilized the same demographic models described above for our frequency-based  
162 test to understand whether the haplotypes surrounding derived alleles at NLS are  
163 longer than expected under a neutral model, conditional on the map of  
164 recombination in the OAS region. Again, we found that several derived  
165 Neandertal-like alleles are significantly longer than observed in simulated loci, and  
166 that these results were robust to a series of alternative simulation models tested,  
167 including the one- and two-pulse models described above and two additional one-  
168 pulse models which varied the mutation and recombination rates (Figure 3B, Table  
169 S4).

170 Finally, we calculated the levels of population differentiation between European  
171 and East Asian populations for all NLS in the OAS region. Interestingly, we found  
172 extreme levels of differentiation for most NLS ( $F_{st}$  as high as 0.6,  $P_{\text{empirical}} < 0.01$ ,  
173 Figure 3C. Table S5), except within the genomic region covering *OAS1* and part of  
174 *OAS3*. These results suggest that NLS surrounding *OAS1* have been positively  
175 selected in both European and East Asian populations but that distinct haplotypes  
176 have been selected in Europe and Asia.

177 Our population genetic results provide evidence that Neandertal alleles at the OAS  
178 locus have likely experienced positive selection during one or several phases after  
179 their introduction into the human population, suggesting a possible functional role  
180 of these alleles in human innate immune responses. To study this possibility, we  
181 analyzed RNA-sequencing data collected on primary macrophages from 96



182 European-descent individuals, before and after *in-vitro* infection with *Salmonella*  
183 *typhimurium*. After 2 hours of infection, we found that all OAS genes were  
184 strongly up-regulated (up to 19-fold,  $P < 1 \times 10^{-10}$ , Figure S5), confirming the  
185 ability of *Salmonella* to activate the interferon (IFN) production pathway [31-33].  
186 Using genotype data available for the same individuals (673 SNPs spanning the  
187 OAS region, see methods) we tested if NLS were associated with variation in the  
188 expression levels of *OAS1*, *OAS2* or *OAS3*, in either infected or non-infected  
189 macrophages. We found that among NLS, individuals that are heterozygous or  
190 homozygous for the Neandertal allele show reduced expression levels of *OAS3*  
191 (i.e., they were expression quantitative trait loci, or *cis* eQTL for *OAS3*) (Figure  
192 4A, false discovery rate (FDR) < 10%, Table S6). Interestingly, these *cis* eQTL  
193 showed a much stronger effect in infected macrophages (best  $P_{salmonella} = 3.5 \times 10^{-3}$   
194 vs best  $P_{non-infected} = 0.027$ ), supporting an interaction between the Neandertal  
195 haplotype and the *OAS3* response to *Salmonella* infection.

196 In addition to overall changes in expression, we took advantage of the power of  
197 RNA-sequencing data to test if NLS in the OAS regions influenced the ratio of  
198 alternative isoforms used for each of the OAS genes (i.e., alternative splicing  
199 QTL: asQTL). We found that SNPs associated with the Neandertal haplotype are  
200 significant asQTL for *OAS1* and *OAS2* in both infected and non-infected  
201 macrophages (FDR << 1%; Figure 4B-C). The effect of the splice site variant  
202 rs10774671 at determining what isoform is primarily encoded by *OAS1* was  
203 particularly strong ( $P \leq 2 \times 10^{-32}$ ). This SNP is also a strong asQTL and protein  
204 QTL in lymphoblastoid cell lines [34,35]. The ancestral G allele at this SNP (AG

205 at acceptor site) retains the splice site whereas the derived allele, A, (AA at  
206 acceptor site) disrupts the splice site leading to the usage of a distinct isoform  
207 (Figure S6). The Neandertal haplotype harbors the ancestral allele (encoding the  
208 p46 isoform), which is associated with high enzyme activity [36]. Interestingly,  
209 despite the fact that this ancestral allele is found at ~ 60-70% in most Sub-Saharan  
210 African populations, outside of Africa this allele is only found on individuals with  
211 the Neanderthal haplotype (with rare exceptions; ~2% of all haplotypes, Figure S2  
212 suggesting that the Neandertal segment is effectively reintroducing an ancestral  
213 variant that was already present in other human groups. To validate that this SNP  
214 had the same impact at determining what *OAS1* isoforms are expressed in African-  
215 descent individuals, we analyzed additional RNA-sequencing data collected from  
216 41 African-American individuals. As among Europeans, rs10774671 is a strong  
217 asQTL for *OAS1* in both non-infected and infected macrophages ( $P < 1 \times 10^{-15}$ ,  
218 Figure S7), despite laying in a non-Neandertal haplotype.

219 Because OAS genes are primarily involved in the control of viral infections we  
220 decided to validate our functional findings on peripheral blood mononuclear cells  
221 (PBMCs) from 40 individuals stimulated/infected with viral-ligands (polyI:C and  
222 gardiquimod), and live viruses (Influenza, Herpes simplex virus (HSV) 1 and  
223 HSV2). The individuals were chosen based on their genotype for the NLS  
224 rs1557866, a SNP that is a strong proxy for the presence or absence of the  
225 Neandertal haplotype in the OAS region (9 were homozygous for the Neandertal  
226 haplotype, 15 were heterozygous, and 16 homozygous for the modern human  
227 sequence).

228 As expected, we found that all viral-associated immune triggers led to a marked  
229 increase in *OAS1-3* gene expression levels, as measured by real-time PCR (up to  
230 27-fold,  $P \leq 1.2 \times 10^{-8}$ , Figure 5A), concomitantly with the up-regulation of type-I  
231 and type-II interferon genes (Figure S8). Confirming the QTL results obtained in  
232 macrophages, we found that rs10774671 was a strong asQTL for *OAS1* in both  
233 non-infected and infected PBMCs ( $P \leq 4.9 \times 10^{-5}$ , Figure 5B). Likewise, we found  
234 that the presence of the Neandertal haplotype was associated with reduced  
235 expression levels of *OAS3*, particularly in PBMCs infected with influenza ( $P =$   
236  $6.1 \times 10^{-3}$ ) and the synthetic ligand gardiquimod ( $P = 2.0 \times 10^{-4}$ ), which mimics a  
237 single strand RNA infection (Figure 5B). Interestingly, the Neandertal haplotype  
238 harbors additional regulatory variants that only impact expression levels in a cell-  
239 type and immune stimuli specific fashion. For example, we found that the  
240 Neandertal haplotype is associated with increased expression levels of *OAS2* in  
241 non-infected ( $P = 1.2 \times 10^{-3}$ ), and gardiquimod-stimulated PBMCs ( $P = 4.9 \times 10^{-3}$ ), but  
242 neither in macrophages nor in PBMCs treated with other viral agents. Collectively,  
243 our functional data provide evidence for a pervasive impact of the Neandertal  
244 haplotype on the regulation of *OAS* genes that varies depending on the cell type  
245 and the immune stimuli to which the cells are responding.

## 246 **Discussion**

247 The Neandertal lineage was present in Eurasia for at least 400,000 years [37],  
248 providing ample time for Neandertals to adapt to local disease environments. The  
249 admixture process, which likely fostered the transmission of pathogens between

250 Neandertals and humans migrating out of Africa, could have also led to the  
251 exchange of genes useful in responding to local pathogens. Here, we have  
252 demonstrated that a previously reported case of Neandertal introgression at the  
253 OAS locus [15] displays signatures of positive selection in the European  
254 population. Additionally, we have strengthened the case for adaptive introgression  
255 by providing direct functional evidence of a role for the Neandertal OAS  
256 haplotype in the regulatory responses in innate immune cells to infectious agents.

257 Our results show that the Neandertal haplotype at OAS is associated with several  
258 regulatory variants that reduce expression of *OAS3* in response to infection, as  
259 well as encode alternate isoforms of *OAS1* and *OAS2*. These dramatic functional  
260 implications of the Neandertal OAS haplotype support our case for adaptive  
261 introgression at OAS. Yet, because distinct functional polymorphisms segregate  
262 together in the same haplotype, inferring the exact variant(s) targeted by positive  
263 selection remains a daunting task. We speculate, however, that one of the strongest  
264 direct targets of selection is likely to have been the splice variant identified in  
265 *OAS1*.

266 The Neandertal haplotype carries the ancestral allele (G) of the *OAS1* splice  
267 variant (rs10774671), which is common both inside and outside of Africa.  
268 However, outside of Africa, the only haplotypes carrying this ancestral splice site  
269 are closely related to the Neandertal haplotype, with a few exceptions being rare  
270 recombined haplotypes (~2% of all haplotypes with the ancestral allele). This  
271 pattern reflects the possibility that Neandertal introgression, in effect, served as a

272 means to resurrect the ancestral splice site from local extinction outside of Africa,  
273 probably following the out-of-Africa exodus. Interestingly, the same ancestral  
274 splice site is found in the Denisovan genome, and may similarly have impacted  
275 adaptive introgression into the ancestors of Melanesians. While we cannot at  
276 present confirm that the ancestral splice site was missing from the ancestral  
277 Eurasian population, the presence of this allele only on the Neandertal haplotype  
278 hints at the possibility that this splice site was lost to drift and subsequently re-  
279 introduced by Neandertals, providing beneficial genetic variation at the OAS locus  
280 (Figure S2). The Neandertal-introgressed allele encodes a protein variant (p46)  
281 that is associated with higher enzymatic activity [36]. The adaptive potential of  
282 this variant is supported by the observation that this variant (or other variants in  
283 strong LD with it) was shown to be associated with: (i) reduced infection and  
284 replication rates of West Nile virus ([38], but see [39]), (ii) improved resistance to  
285 hepatitis C virus (HCV) infection [40,41], and (iii) variable symptomology of  
286 Tick-Borne Encephalitis (TBE) Virus-Induced Disease (homozygous individuals  
287 for the Neandertal haplotype show the most severe symptoms of TBE). Strikingly,  
288 West Nile, hepatitis C and TBE are all members of the *Flaviviridae* family,  
289 suggesting that Flaviviruses might have been the main drivers of selection in  
290 *OAS1*.

291 The differential responses of homozygous carriers of the Neandertal OAS  
292 haplotype to the different viruses described above suggest that the Neandertal  
293 haplotype is not uniformly beneficial in humans. Thus, it is plausible that both  
294 spatial and temporal fluctuations in virus populations could have led to fluctuating

295 selection pressure on Neandertal OAS haplotypes, consistent with findings that  
296 genes in the immune system have been disproportionately targeted by positive  
297 selection since the dawn of agriculture [42].

298 Alternatively, and not mutually exclusively, alleles at OAS, and particularly the  
299 *OAS1* splice variant, might be evolving under balancing selection. This hypothesis  
300 is supported by the observation that the *OAS1* splice variant (rs10774671) is found  
301 at high frequency worldwide (0.11-0.7), and the significantly higher Tajima's D  
302 values observed around *OAS1*, as compared to genome-wide expectations (Figure  
303 3D). Moreover, *OAS1* is among the most diverse genes in both humans and non-  
304 human primates. Indeed, a recent analysis of genome-wide sequence data from a  
305 total of 55 individuals from four non-human ape species, chimpanzee (*Pan*  
306 *troglodytes ellioti*), bonobo (*Pan paniscus*), gorilla (*Gorilla gorilla gorilla*), and  
307 orangutan (*Pongo abelii*), identified *OAS1* as in the top 1% of genes showing the  
308 largest levels of nucleotide diversity among ape species, consistent with a scenario  
309 of long-term balancing selection (*OAS2* and *OAS3* are ranked in the 60th and 36th  
310 percentile of the genome-wide distribution, respectively) or, as previous research  
311 has suggested, rapid evolution across the primate order [43]. Further supporting  
312 the idea of balancing selection on the introgressed haplotypes, our functional data  
313 suggest that the Neandertal haplotype contributes a range of gene expression  
314 responses in a cell-type and stimulus-specific manner.

315 Estimates of historical allele frequencies at the OAS locus support the notion that  
316 the Neandertal haplotype did not follow a classic selective sweep model with

317 constant directional selection. Under such a model, the observed present-day  
318 frequency of the Neandertal haplotype at the OAS locus of roughly 38% would  
319 suggest a codominant fitness effect of  $s \sim 0.0014 - 0.0017$ , when assuming an  
320 initial frequency of 0.02 at introgression approximately 2,000-2,400 generations  
321 ago (Methods). However, the observed allele frequency shift of 0.26 over the past  
322 200-340 generations (maximum shift in CEU from ancient samples; see Figure  
323 2B) suggests that the selection coefficient associated with the Neandertal  
324 haplotype during this recent human evolution would have been  $s \sim 0.0044 -$   
325  $0.0075$ : 2.6-5.4 times larger than the above estimate. Therefore, both temporally  
326 varying selection and balancing selection could explain why the Neandertal  
327 haplotype at OAS did not show clear signatures of adaptive introgression in  
328 previous studies [15,18].

329 Our study illustrates the difficulty of identifying strong candidates for adaptive  
330 introgression. In a genome-wide statistical framework, our use of neutral  
331 coalescent simulations as a null distribution for adaptive introgression likely  
332 would not have provided significant results after multiple test correction across  
333 loci. This suggests that other instances of less obvious adaptive introgression,  
334 especially those that did not follow a classic selective sweep model, may remain to  
335 be identified. Moving forward, novel methods must be developed to identify such  
336 cases. Some progress is now being made on this front. For example, Racimo and  
337 colleagues [11] recently developed a genome-wide statistical framework which  
338 relies on distributions of uniquely shared derived alleles between humans and  
339 Neandertals (as does our study) to identify candidate regions for adaptive

340 introgression. This study also highlighted the OAS locus as a candidate for  
341 adaptive introgression. Additionally, estimates of historical allele frequencies with  
342 increased spatial and temporal resolution provided by the sequencing of ancient  
343 human genomes are likely to play an important role in illuminating candidates for  
344 adaptive introgression which do not conform to classical selective sweep models.

## 345 **Conclusions**

346 In conclusion, our study demonstrates that the frequency and haplotype  
347 distribution of Neandertal-like sites can be used in a neutral simulation framework  
348 that accounts for local genomic context to investigate the history of selection at a  
349 candidate locus for which genome-wide tests of selection provide ambiguous  
350 results. When combined with functional data, our results provide the strongest  
351 evidence to date in support of adaptive introgression in the OAS region. More  
352 generally, our study raises the possibility that adaptive introgression might not  
353 necessarily occur to select newly introduced variants but rather as a means to  
354 resurrect adaptive variation in modern human populations that had been lost due to  
355 demographic events.

## 356 **Materials and Methods**

### 357 *1. Genome alignments and identification of Neandertal-like sites*

358 Human/chimpanzee ancestral states were computed by parsimony using  
359 alignments from the UCSC Genome Browser for the human reference (hg19) and  
360 three outgroups chimpanzee (panTro2), orangutan (ponAbe2), and rhesus macaque



361 (rheMac2) [44]. Ancestral state was assumed to be the chimpanzee allele (if  
362 available) if its state was confirmed by matching either orangutan or macaque. All  
363 sites with no inferred ancestral state were removed from our analysis.

364 We filtered the Altai Neandertal genome [4] and Denisovan genome [3] using the  
365 map35\_50 set of minimum filters provided at  
366 ([https://bioinf.eva.mpg.de/altai\\_minimal\\_filters/](https://bioinf.eva.mpg.de/altai_minimal_filters/)). For the frequency analysis, we  
367 combined these filtered datasets with ten samples from outside of Africa (5-Eur  
368 European: CEU, FIN, GBR, IBS, TSI; 5-East Asian: CDX, CHB, CHS, JPT,  
369 KHB; see Table S7 for population codes) and one sub-Saharan African sample  
370 YRI (Yoruba in Ibadan, Nigeria) from the 1000 Genomes Project Phase 3 [20],  
371 which we downloaded from  
372 (<https://mathgen.stats.ox.ac.uk/impute/1000GP%20Phase%203%20haplotypes%2006%20October%202014.html>).  
373

374 We first extracted all biallelic variants in our human, Neandertal, and chimpanzee  
375 alignments. We considered as Neandertal-like sites (NLS) only those variants  
376 where the African sample (YRI) had a derived allele frequency of zero and both  
377 the non-African sample and Neandertal carried the derived allele. We restricted  
378 the follow-up haplotype based analysis to only the CEU sample. In that analysis  
379 we required the derived allele to be present in CEU in at least two copies in order  
380 to calculate our haplotype-based test statistic ( $H_{D/A}$ ).

381 *2. Haplotype clustering in the 1000 Genomes Project data*

382 To assess the relationships and frequencies of Neandertal-like haplotypes in the  
383 OAS region, we identified haplotype clusters based on sequence similarity. First,  
384 we filtered all 5,008 haplotypes in the 1000 Genomes Project phase 3 dataset to  
385 include only SNPs within the bounds of the three OAS genes (hg19 chr12:  
386 113344739-113449528) and at which the Altai Neandertal [4]and Denisovan [3]  
387 genomes carry homozygous genotypes. Next, we clustered the human haplotypes  
388 such that all haplotypes in a cluster had no more than 60 pairwise differences,  
389 which resulted in 10 clusters. We inferred a consensus haplotype for each cluster  
390 based on the majority allele at each position in the cluster. Finally, we produced a  
391 neighbor-joining tree of the human cluster consensus sequences and the Altai,  
392 Denisovan, and ancestral sequences using the R package “ape.” We estimated  
393 confidence values for nodes with one thousand bootstraps.

394 We then calculated haplotype frequencies for each of the 1000 Genomes Project  
395 population samples based on the assignment of each haplotype to the clusters  
396 described above.

### 397 *3. Demographic model and neutral coalescent simulations*

398 We performed coalescent simulations of the demographic history of the European,  
399 East Asian, African, and Neandertal populations applied by Vernot and Akey [25]  
400 based on previously inferred demographic models [23,24]. In our first set of  
401 simulations, which were performed with ms [45], we extracted only allele  
402 frequencies at NLS. We gathered a total of 1 million simulation results. In each  
403 simulation run, a result was collected if a NLS was present in either the European

404 or the East Asian population sample (or both). Therefore, null distributions  
405 specific to Europeans or East Asians included less than 1 million results (but  
406 typically > 800,000). Haplotype simulations were performed with macs [46] in  
407 order to explicitly simulate the genetic map (downloaded with the 1000 Genomes  
408 samples at the link above) of the 600 kilobase region centered on OAS  
409 (chr12:113100000-113700000). The general shape of the demographic model is  
410 illustrated in Figure S1. Our baseline simulations were performed with the  
411 parameters specified in Table S1, assuming 25 years per generation and a mutation  
412 rate of  $2.5 \times 10^{-8}$  per bp per generation. Table S1 also provides all parameters used  
413 in one- and two- introgression pulse simulations. Additionally, we examined the  
414 one-pulse model with a slower mutation rate ( $1.25 \times 10^{-8}$ ) and a one-pulse model  
415 with a uniform recombination rate ( $1.3 \times 10^{-8}$ ; a value conservatively lower than  
416 the average for the OAS region,  $1.7 \times 10^{-8}$ ). Sample ms and macs commands are  
417 given at the end of this section.

418 For haplotype-based simulations, data were thinned in a manner similar to  
419 Sankararaman *et al.* 2014 [6] to account for imperfect SNP ascertainment in the  
420 1000 Genomes dataset, such that SNPs with minor allele count of 1, 2, 3, 4, 5, 6, 7,  
421 8, 9, and  $\geq 10$  were accepted with probabilities 0.25, 0.5, 0.75, 0.8, 0.9, 0.95,  
422 0.96, 0.97, 0.98, and 0.99, respectively. Additionally, we only kept SNPs that  
423 were polymorphic in the simulated CEU sample. Finally, we performed an  
424 additional thinning of SNPs with uniform probability of 0.05 of removal to  
425 account for slightly elevated SNP density in the simulated data. The resulting  
426 simulated datasets had an average SNP density of 3.8 SNPs per kb compared to

427 2.5 in the real data. This is a slightly larger than ideal difference in SNP density,  
428 but we note that neither derived allele frequency, nor our primary haplotype-based  
429 test statistic (described below) should be particularly sensitive to SNP density. In  
430 fact, Figure S9 illustrates that our statistic is conservative with respect to SNP  
431 density. Additionally, our results hold in a simulation with half the mutation rate  
432 of our baseline simulation. This simulation resulted in an average SNP density of  
433 1.9 SNPs per kb. So our observation of long haplotypes surrounding NLS is  
434 robust to SNP density across our simulations.

435 Sample ms command:

```
436 ms 752 1 -s 1 -I 4 250 250 250 2 0 -n 1 58.0027359781 -n 2 70.0410396717 -n 3  
437 187.549931601 -n 4 0.205198358413 -eg 0 1 482.67144247 -eg 0 2  
438 505.592963281 -eg 0 3 720.224280773 -em 0 1 2 0.358619661426 -em 0 2 1  
439 0.358619661426 -em 0 1 3 0.111889334365 -em 0 3 1 0.111889334365 -em 0 2 3  
440 0.446122858814 -em 0 3 2 0.446122858814 -en 0.00699726402189 1  
441 1.98002735978 -eg 0.00699726402189 2 0.0 -eg 0.00699726402189 3  
442 17.5076517287 -en 0.03146374829 2 2.03666547538 -en 0.03146374829 3  
443 0.700185007205 -ej 0.0641347992705 3 2 -em 0.0641347992705 1 2 0.00015 -em  
444 0.0641347992705 2 1 0.00015 -em 0.0839811779742 2 4 0.00075 -em  
445 0.0846651725023 2 4 0 -ej 0.0957592339261 2 1 -en 0.202462380301 1 1.0 -ej  
446 0.957592339261 4 1
```

447 Sample macs command:

448 macs 416 600000 -t 0.000731 -R oas\_recrates.txt -I 4 216 198 0 2 0 -n 1  
449 58.0027359781 -n 2 70.0410396717 -n 3 187.549931601 -n 4 0.205198358413 -  
450 eg 0 1 482.67144247 -eg 1e-12 2 460.409556336 -eg 2e-12 3 720.224280773 -em  
451 3e-12 1 2 0.4441436762 -em 4e-12 2 1 0.4441436762 -em 5e-12 1 3  
452 0.138572826974 -em 6e-12 3 1 0.138572826974 -em 7e-12 2 3 0.552514733193 -  
453 em 8e-12 3 2 0.552514733193 -en 0.00699726402189 1 1.98002735978 -eg  
454 0.00699727402189 2 0.0 -eg 0.00699728402189 3 18.896348561 -en  
455 0.03146374829 2 2.79399962717 -en 0.03146375829 3 0.670250141711 -ej  
456 0.051785044418 3 2 -em 0.051785054418 1 2 0.00015 -em 0.051785064418 2 1  
457 0.00015 -em 0.0555806720117 2 4 0.00075 -em 0.0562646665398 2 4 0 -ej  
458 0.0957592339261 2 1 -en 0.202462380301 1 1.0 -ej 0.957592339261 4 1 -h 1e3

#### 459 *4. Frequency and haplotype-based tests of neutrality using simulations*

460 We examined the consistency of genetic variation with our neutral model using  
461 several approaches. First, we examined the likelihood of observing (Neandertal)  
462 allele frequencies as high as the OAS locus. Under neutrality, allele frequency is  
463 not dependent upon recombination rate, therefore, we can estimate the likelihood  
464 of our observed NLS frequency in the OAS region. To create a distribution of  
465 expected NLS frequency in each introgression model, we first extracted derived  
466 allele counts (DAC) at simulated NLS for samples of 250 individuals each for  
467 Europeans and East Asians in the simulated model. Next, for each non-African  
468 population sample from the 1000 Genomes Project, we binomially sampled the  
469 DACs from the appropriate simulated population (European for CEU, GBR, IBS,

470 TSI; East Asian for CDX, CHB, CHS, JPT, KHV) using the true population  
471 sample size to create a distribution of NLS frequencies that is specific to each  
472 population sample (Figure 2A, S3). Minimum p-values across the OAS locus for  
473 each population are listed in Table S2.

474 Additionally, we wanted to examine if the haplotypes carrying NLS at the OAS  
475 locus are longer than expected under neutrality when conditioning on the observed  
476 frequencies and the underlying genetic map, which would provide an additional  
477 signature of selection on introgressed haplotypes beyond empirical haplotype  
478 signatures. For this purpose, we modified a simple haplotype statistic  $H$  [47],  
479 which measures the average length of pairwise homozygosity tracts in base pairs –  
480 a quantity that is very straightforward to interpret. As selective sweeps are  
481 expected to create long haplotypes around the selected site, the  $H$  statistic should  
482 be higher in samples containing positively selected haplotypes compared to  
483 samples containing neutrally evolving haplotypes, when frequency and  
484 recombination are properly controlled, similar to other statistics based on  
485 haplotype lengths, such as  $EHH$ ,  $iHS$ , and  $nSL$  [28,30,48]. However, in contrast to  
486 these other statistics,  $H$  does not require specification of analysis parameters such  
487 as minimum haplotype homozygosity levels below which haplotypes are no longer  
488 extended.

489 Under adaptive introgression, we specifically expect the introgressed (derived  
490 allele carrying) haplotypes to be longer than the ancestral haplotypes, due to the  
491 fact that selected Neandertal haplotypes will on average spend less time at low

492 frequency, where they have a greater opportunity for recombination with non-  
493 introgressed haplotypes, than neutral Neandertal haplotypes. We therefore defined  
494 our test statistic,  $H_{D/A}$ , as:

$$495 \quad H_{D/A} = \ln(H_D / H_A);$$

496 where  $H_D$  and  $H_A$  are  $H$  calculated across haplotypes carrying derived NLS allele  
497 versus the ancestral allele (see Figure S10).

498 For each model we generated 1,000 simulated OAS regions containing NLS that  
499 reach a frequency greater than the 99<sup>th</sup> percentile for CEU in our frequency  
500 simulations. We calculated  $H_{D/A}$  for every simulated NLS and for every NLS in our  
501 true sample. We then compared our simulation results to the observed data in two  
502 ways. First, to visually examine the distribution of true  $H_{D/A}$  values to neutral  
503 simulations, we took the mean  $H_{D/A}$  score across all NLS in each of 1,000  
504 simulations and calculated the 95<sup>th</sup> and 99<sup>th</sup> percentiles of those 1,000 simulations  
505 (Figure 3B). Second, to examine the probability under neutrality of the observed  
506  $H_{D/A}$  values at the peak of  $H_{D/A}$  between chr12:113380000-113420000, we  
507 compared the mean  $H_{D/A}$  score for SNPs in this window to the mean of SNPs in  
508 this window for each simulation that produced a NLS in that window. These  
509 results for all tested models are listed in Table S4.

### 510 *5. Analysis of ancient Eurasian data*

511 We utilized supplementary data table 3 from Mathieson *et al.* [26]. This table  
512 includes maximum likelihood allele frequency estimates for three ancient

513 population samples (HG- Hunter-gatherer, EF- Early farmer, SA- Steppe ancestry)  
514 and four present day European samples from the 1,000 Genomes Project (see  
515 “Genome-wide scan for selection” section of methods in[26]). We intersect this  
516 table with allele frequencies for 1,000 Genomes Yorubans (YRI) and the Altai  
517 Neandertal genotypes and only analyze sites for which we have data for all  
518 samples (1,004,612 SNPs).

519 To calculate the expected allele frequency in modern samples under drift, we used  
520 the estimated proportions ( $m$ ) of (HG, EF, SA) in each of the four present-day  
521 samples estimated by Mathieson *et al.* [26]: CEU = (0.196, 0.257, 0.547), GBR =  
522 (0.362, 0.229, 0.409), IBS = (0, 0.686, 0.314) and TSI = (0, 0.645, 0.355). We  
523 calculated the expected frequency  $E[p]$  of site as:

$$524 \quad E[p] = \sum_i^{\{HG,EF,SA\}} (p_i \times m_i)$$

525 Next, we calculated the absolute difference between observed and expected allele  
526 frequency in all four present-day European samples at all available sites. To test  
527 the null hypothesis that OAS NLS have not changed in frequency more than  
528 expected under neutrality at 11 SNPs in the central OAS region  
529 (chr12:113200000-113600000), we first calculated the fraction of all autosomal  
530 SNPs in the dataset at similar present-day frequency (within 1 percent in the  
531 folded frequency spectrum) of each OAS NLS. Finally, we calculated the fraction  
532 of autosomal SNPs with an absolute observed minus expected frequency



533 difference greater than or equal to the OAS NLS. These results are given in Table  
534 S3 and illustrated in Figure 2B.

535 This test does not explicitly incorporate variance in estimated ancient allele  
536 frequency. However, any bias in ancient allele frequency estimation should be  
537 distributed randomly across the genome. Therefore, our comparison to a genome-  
538 wide distribution of SNPs at similar present-day frequency should incorporate  
539 most of this error. Nonetheless, the selection test performed by Mathieson *et al.*  
540 [26] does incorporate such error, so we can also look to the Ps from that test to  
541 ensure consistency with our results.

#### 542 *6. Estimation of selection coefficients*

543 To estimate the selection coefficient  $s$  under constant positive selection for a given  
544 starting frequency ( $x_0$ ), final frequency ( $x_1$ ), and number of generations between  
545 these estimates ( $\Delta t$ ), we assumed a model of standard logistic growth of a  
546 codominant allele:

$$547 \quad x_1 = \frac{x_0}{x_0 + (1 - x_0)e^{-s\Delta t}}$$

548 This equation can be easily solved to obtain  $s$ , given  $x_0$ ,  $x_1$ , and  $\Delta t$ .

#### 549 *7. Probabilities that Neandertal haplotypes are shared due to incomplete lineage* 550 *sorting*

551 We estimated the probability that Neandertal haplotypes observed in the OAS  
552 region could be a product of ILS using the method outlined by Huerta-Sanchez *et*  
553 *al.* [49]. This method estimates the probability that a haplotype of length (H) is  
554 shared due to incomplete lineage sorting as:

$$555 \quad P(H) = 1 - \text{gammaCDF}(H, \text{shape} = 2, \text{rate} = 1/L) ;$$

556 where L is the expected shared length,  $L = 1/(r \times t)$  where r is recombination rate  
557 and t is time in generations.

558 We first estimated the maximum haplotype length observed in each of the 1000  
559 Genomes Project population samples by identifying tracts of identity-by-state  
560 (IBS) that include NLS between the Altai Neandertal haplotype (considering only  
561 homozygous positions) and individual human haplotypes. We identified all tracts  
562 of IBS bounded by NLS (using YRI as the African reference) and took the  
563 maximum of these per-population sample IBS distributions.

564 We identified the maximum tract length (198,441 bp) in European (and some  
565 admixed Native American) samples. Maximum tract length for East Asian  
566 samples (54,385 bp) is notably shorter. As expected, no IBS tracts were identified  
567 in African population samples.

568 Assuming a conservatively low recombination rate for the OAS region ( $1.3 \times 10^{-8}$ )  
569 and a conservatively short divergence between Neandertals and humans of 300  
570 thousand years (and 25 years per generation), the probability of a length of at least  
571 54,385 is  $P(54385) = 0.002$ . The probability of the longest tracts is much smaller,

572  $P(198441) = 1.15 \times 10^{-12}$ . Therefore, it is unlikely that Neandertal haplotypes are  
573 shared with non-Africans due to shared ancestral variation.

574 We repeated this analysis using the Denisovan genome and found no IBS tracts  
575 defined by Denisovan-like sites, suggesting that introgressed Denisovan  
576 haplotypes described by Mendez *et al.* [17] are not present in the 1000 Genomes  
577 Project Samples, consistent with our findings in Figure 1A.

#### 578 *8. Neutrality tests in phase 3 of the 1000 Genomes data.*

579 We calculated iHS, DIND, Fst and Tajima's D on different populations from  
580 phase 3 of the 1000 Genomes project. The phased data were downloaded from  
581 Impute reference data panel  
582 ([https://mathgen.stats.ox.ac.uk/impute/1000GP\\_Phase3.html](https://mathgen.stats.ox.ac.uk/impute/1000GP_Phase3.html)) and were filtered for  
583 biallelic SNPs. Arlequin version 3.5.1.3 [50] was then used to calculate Fst  
584 estimates derived from ANOVA among all pairs of European and Asian  
585 populations. DIND was calculated as previously described [29] and Tajima's D  
586 was calculated for all SNPs using a window of 25kb either side of each SNP (i.e.,  
587 in window of 50kb in total). iHS values were recovered from a genomic scan  
588 performed using hapbin [51] on the same phase 3 release of the 1000 Genomes  
589 dataset.

#### 590 *9. Sample collection*

591 Buffy coats from 96 healthy European American donors and 41 African  
592 Americans were obtained from Indiana Blood Center (Indianapolis, IN, USA).

593 Only individuals self-reported as currently healthy and not under medication were  
594 included in the study. The project was approved by the ethics committee at the  
595 CHU Sainte-Justine (protocol #4022). The individuals recruited in this study were  
596 males aged 18 to 55 years old. For 80% of our samples we have information on  
597 their exact age (for the remaining 20% of donors we only know that they were  
598 adults less than 55 years old), and we found no association between the presence  
599 of the Neandertal haplotype (as measure by rs1557866) and age ( $P > 0.5$ ). Thus,  
600 variation in age is not likely impact any of our conclusions. In addition to self-  
601 identified ancestry labels, we used the genome-wide genotype data (see section 10)  
602 to estimate genome-wide levels of European and African ancestry in each sample  
603 using the program ADMIXTURE [52]. Consistent with previous reports, we found  
604 that self-identified EA showed limited levels of African admixture (mean= 0.4%,  
605 range 0-13%). The African Americans used in our study were selected on having  
606 at least 75% of African ancestry.

#### 607 *10. DNA Extraction and genotyping*

608 DNA from each of the blood donors was extracted using the Gentra Pure Gene  
609 blood kit (Qiagen). Genotyping of each individual was then performed by  
610 Illumina's HumanOmni5Exome bead Chip array and complemented with imputed  
611 data from the 1000 Genomes data using Impute2 [53]. Here, we only focused on  
612 genetic diversity surrounding the OAS region – chr12:113229549-113574044 (~  
613 344Kb) spanning from the beginning of *RPH3A* to the end of *RASALI* – for a total  
614 of 673 SNPs with a MAF above 10%. Genotypes can be found in Table S8.

615 *11. Isolation of monocytes and differentiation of macrophages*

616 Blood mononuclear cells were isolated by Ficoll-Paque centrifugation. Monocytes  
617 were purified from peripheral blood mononuclear cells (PBMCs) by positive  
618 selection with magnetic CD14 MicroBeads (Miltenyi Biotech) using the  
619 autoMACS Pro Separator. All samples had purity levels above 90%, as measured  
620 by flow cytometry using an antibody against CD14 (BD Biosciences). Monocytes  
621 were then cultured for 7 days in RPMI-1640 (Fisher) supplemented with 10%  
622 heat-inactivated FBS (FBS premium, US origin, Wisent), L-glutamine (Fisher)  
623 and M-CSF (20ng/mL; R&D systems). Cell cultures were fed every 2 days with  
624 complete medium supplemented with the cytokines previously mentioned. Before  
625 infection, we systematically verified that the differentiated macrophages presented  
626 the expected phenotype for non-activated macrophages (CD1a+, CD14+, CD83-,  
627 and HLA-DRlow (BD Biosciences)).

628 *12. Bacterial preparation and infection of macrophages*

629 The day prior to infection, aliquots of *Salmonella typhimurium* (Keller strain) were  
630 thawed and bacteria were grown overnight in Tryptic Soy Broth (TSB) medium.  
631 Bacterial culture was diluted to mid-log phase prior to infection and supernatant  
632 density was checked at OD600. Monocyte-derived macrophages were then  
633 infected with *Salmonella typhimurium* at a multiplicity of infection (MOI) of 10:1.  
634 A control group of non-infected macrophages was treated the same way but using  
635 medium without bacteria. After 2 hours in contact with the bacteria, macrophages  
636 were washed and cultured for another hour in the presence of 50 mg/ml of

637 gentamycin in order to kill all extracellular bacteria present in the medium. The  
638 cells were then washed a second time and cultured in complete medium with 3  
639 mg/ml gentamycin for an additional 2 hours, the time point to which we refer in  
640 the main text.

### 641 *13. Infection/stimulation of PBMC*

642 PBMCs from a subset of 40 individuals used to derive macrophages were cultured  
643 in RPMI-1640 (Fisher) supplemented with 10% heat-inactivated FBS (FBS  
644 premium, US origin, Wisent) and 1% L-glutamine (Fisher). The 30 individuals  
645 were chosen based on their genotype for rs1557866, a SNP which derived allele is  
646 of Neandertal origin and that we used as a proxy to identify individuals harbouring  
647 the Neandertal haplotype in the OAS region. From the 40 individuals, and based  
648 on this SNP, 9 individuals were homozygous for the Neandertal haplotype, 15  
649 were heterozygous, and 16 homozygous for the modern human sequence.

650 For each of the tested individuals, PBMCs (1 million per condition) were  
651 stimulated/infected with one of the following viral-associated immune challenges:  
652 polyI:C (10 µg/ml, TLR3 agonist), gardiquimod (0.5µg/ml, TLR7 and TLR8  
653 agonist), Influenza PR8 WT (multiplicity of infection (MOI) of 0.05:1), Herpes  
654 simplex virus (HSV) 1 (1.55x10<sup>2</sup> CPE), and HSV2 (19.5x10<sup>4</sup> CPE). PBMCs were  
655 stimulated/infected for 4 hours with TLR ligands and Influenza, and 6h with  
656 HSV1 and HSV2. A control group of non-infected PBMC was treated the same  
657 way but with only medium.

658 *14. RNA extraction, RNA-seq library preparation, and sequencing*

659 Total RNA was extracted from the non-infected and infected/stimulated cells  
660 using the miRNeasy kit (Qiagen). RNA quantity was evaluated  
661 spectrophotometrically, and the quality was assessed with the Agilent 2100  
662 Bioanalyzer (Agilent Technologies). Only samples with no evidence of RNA  
663 degradation (RNA integrity number > 8) were kept for further experiments. RNA-  
664 sequencing libraries were prepared using the Illumina TruSeq protocol. Once  
665 prepared, indexed cDNA libraries were pooled (6 libraries per pool) in equimolar  
666 amounts and sequenced with single-end 100bp reads on an Illumina HiSeq2500.  
667 Results based on the entire dataset are described elsewhere (Nédélec *et al.*, under  
668 revision). Here, we only studied transcript-level and gene-level expression  
669 estimates for *OAS1*, *OAS2* and *OAS3*. The transcript-level and gene-level  
670 expression data for these genes can be found in Table S9.

671 *15. Quantifying gene expression values from RNA-seq data*

672 Adaptor sequences and low quality score bases (Phred score < 20) were first  
673 trimmed using Trim Galore (version 0.2.7). The resulting reads were then mapped  
674 to the human genome reference sequence (Ensembl GRCh37 release 65) using  
675 TopHat (version 2.0.6) and using a hg19 transcript annotation database  
676 downloaded from UCSC. Gene-level expression estimates were calculated using  
677 featureCounts (version 1.4.6-p3) and transcript-level expression values were  
678 obtained using RSEM under default parameters.

679 *16. Quantitative real time PCR*

680 For the PBMC samples we measured the expression levels of OAS and interferon  
681 genes using real time PCR. 100ng of high-quality RNA was reverse-transcribed  
682 into cDNA using the qScript cDNA SuperMix (Quanta Biosciences). Quantitative  
683 real time PCR was performed using 96.96 Dynamic Array™ IFCs and the  
684 BioMark™ HD System from Fluidigm. For the TaqMan gene assays, we used the  
685 following TaqMan Gene Expression Assay (Applied BioSystems) to quantify the  
686 expression levels of interferon genes: *IFNA1* (Hs03044218), *IFNA6*  
687 (Hs00819627), and *IFNG* (Hs00989291). To quantify the overall expression levels  
688 of OAS genes, we used probes that capture all common isoforms of *OAS1*  
689 (Hs00973635), *OAS2* (Hs00942643), and *OAS3* (Hs00196324). Custom-made  
690 probes were designed to specifically target the short-isoform of *OAS2* (Forward  
691 Primer Sequence CTGCAGGAACCCGAACAGTT; Reverse Primer Sequence  
692 ACTCATGGCCTAGAGGTTGCA; Reporter Sequence  
693 AGAGAAAAGCCAAAGAA). As housekeeping genes we used: *GAPDH*  
694 (Hs02758991), *GUSB* (Hs99999908), *HPRT1* (Hs99999909), and *POLR2A*  
695 (Hs00172187). The results reported in the manuscript used *POLR2A* as a reference  
696 but all conclusions remain unchanged when using any of the other housekeeping  
697 genes.

698 We start by doing a preamplification of the cDNA using the PreAmp Master Mix  
699 (Fluidigm). Preamplified cDNA was then diluted 2X on a solution of 10 mM Tris-  
700 HCl (pH 8.0) and 0.1 mM EDTA. In order to prepare samples for loading into the  
701 integrated fluid circuit (IFC), a mix was prepared consisting of 360 µL TaqMan



702 Fast Advanced Master Mix (Applied BioSystems) and 36  $\mu\text{L}$  20 $\times$  GE Sample  
703 Loading Reagent (Fluidigm). 2.75  $\mu\text{L}$  of this mix was dispensed to each well of a  
704 96-well assay plate and mixed with 2.25  $\mu\text{L}$  of preamplified cDNA. Following  
705 priming of the IFC in the IFC Controller HX, 5  $\mu\text{L}$  of the mixture of cDNA and  
706 loading reagent were dispensed in each of the sample inlet of the 96.96 IFC. For  
707 the TaqMan gene assays, 5  $\mu\text{L}$  of mixes consisting of 2.5  $\mu\text{L}$  20 $\times$  TaqMan Gene  
708 Expression Assay (Applied BioSystems) and 2.5  $\mu\text{L}$  2X Assay Loading Reagent  
709 (Fluidigm) were dispensed to each detector inlet of the 96.96 IFC. After loading  
710 the assays and samples into the IFC in the IFC Controller HX, the IFC was  
711 transferred to the BioMark HD and PCR was performed using the thermal protocol  
712 GE 96  $\times$  96 Fast v1.pcl. This protocol consists of a Thermal Mix of 70  $^{\circ}\text{C}$ , 30 min;  
713 25  $^{\circ}\text{C}$ , 10 min, Hot Start at 95  $^{\circ}\text{C}$ , 1 min, PCR Cycle of 35 cycles of (96  $^{\circ}\text{C}$ , 5 s;  
714 60  $^{\circ}\text{C}$ , 20 s). Data was analysed using Fluidigm Real-Time PCR Analysis software  
715 using the Linear (Derivative) Baseline Correction Method and the Auto  
716 (Detectors) Ct Threshold Method.

717 To quantify the expression levels of the *OAS1* isoform associated with the derived  
718 allele at the splicing variant rs10774671 we used SybrGreen and the following  
719 forward (GCTGAGGCCTGGCTGAATTA), and reverse  
720 (CCACTTGTTAGCTGATGTCCTTGA) primers. PCR was performed using the  
721 thermal protocol 50  $^{\circ}\text{C}$ , 2 min; 95  $^{\circ}\text{C}$ , 10 min, PCR Cycle of 40 cycles of (95  $^{\circ}\text{C}$ ,  
722 15 s; 60  $^{\circ}\text{C}$ , 1 min). A melting curve was also performed to check for non-specific  
723 amplification.

724 *17. Genotype–Phenotype Association Analysis*

725 eQTL, asQTL were performed against *OAS1*, *OAS2* and *OAS3*. We examined  
726 associations between SNP genotypes and the phenotype of interest using a linear  
727 regression model, in which phenotype was regressed against genotype. In  
728 particular, expression levels were considered as the phenotype when searching for  
729 eQTL and the percentage usage of each isoform in each gene when mapping  
730 asQTL. To avoid low power caused by rare variants, only SNPs in the OAS region  
731 with a minor allele frequency of 10% across all individuals were tested (i.e., 673  
732 SNPs within the region chr12:113229549-113574044). In all cases, we assumed  
733 that alleles affected the phenotype in an additive manner. For the eQTL and  
734 asQTL analyses on macrophages we mapped Salmonella-infected, and non-  
735 infected samples separately. We controlled for false discovery rates (FDR) using  
736 an approach analogous to that of Storey and Tibshirani[54], which makes no  
737 explicit distributional assumption for the null model but instead derives it  
738 empirically null from permutation tests, where expression levels were permuted  
739 1000 times across individuals. For the non-infected and infected/stimulated  
740 PBMCs we only tested expression levels against the SNPs identified as eQTL or  
741 asQTL in the macrophage data (specifically, the SNPs for which boxplots are  
742 shown in Figure 4).

743 **Author Contributions:** Conception and design: AJS, PWM, LBB; Acquisition of  
744 data: AJS, AD, YN, VY, LBB; Analysis and interpretation of data: AJS, AD, YN,  
745 PWM, LBB; Contributed unpublished, essential data, or reagents: CA, JET;  
746 Drafting or revising the article: AJS, PWM, LBB.

747

748 **Acknowledgements:** We thank all members from the Barreiro and Messer labs for  
749 helpful discussions and comments on the manuscript. We thank Dr. Silvia Vidal  
750 for the gift of the Influenza PR8 WT used in this study, Dr. Hugo Soudeyns and  
751 Doris Ransy for advice with the viral infections, and Marc Montero and George  
752 (PJ) Perry for sharing their analysis on nucleotide diversity levels of OAS genes in  
753 non-human primate species.

754

755 **Availability of data and materials:** The datasets supporting the conclusions of  
756 this article are included within the article and in supplementary Tables 8 and 9.  
757 The raw data were deposited under GEO accession numbers GSE73765 and  
758 GSE81046.

759

760 **Competing interests:** The authors declare that they have no competing interests.

761

762 **Funding Statement:** This study was funded by grants from the Canadian  
763 Institutes of Health Research (301538 and 232519), the Human Frontiers Science  
764 Program (CDA-00025/2012) and the Canada Research Chairs Program (950-  
765 228993) (to L.B.B.). Y.N. was supported by a fellowship from the *Réseau de*  
766 *Médecine Génétique Appliquée* (RMGA).

767

768

769

770 **Figures:**

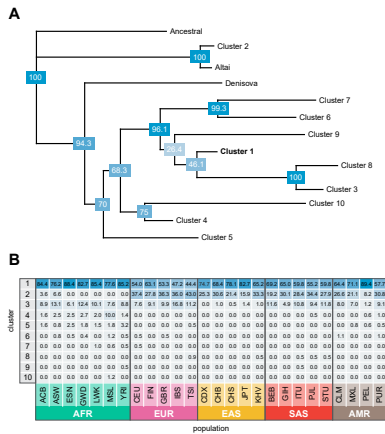

771

772 **Figure 1:** Neandertal introgressed haplotypes in the OAS region. (A) Neighbor-  
 773 joining tree of 5008 phased haplotypes spanning chr12: 113344739-113449528  
 774 (hg19) from phase 3 of the 1000 Genomes Project. Haplotypes were condensed  
 775 into 10 core haplotypes based on the majority allele after clustering into groups of  
 776 haplotypes with pairwise differences of 60 or less. The figure illustrates that the  
 777 Altai haplotype is very similar to “cluster 2” haplotypes found in several human  
 778 populations, while the Denisovan haplotype is not more closely related to any of  
 779 the remaining (non-cluster 2) sequences in this dataset. Bootstrap values (1000  
 780 replicates) are provided in blue boxes at each node. (B) Frequencies of the 10 core  
 781 haplotypes within each 1000 Genomes Project population sample. The most  
 782 common Neandertal-like haplotype, cluster 2, is found only outside of sub-  
 783 Saharan African samples, with the exception of recently admixed populations.  
 784 Population codes can be found in Table S7.

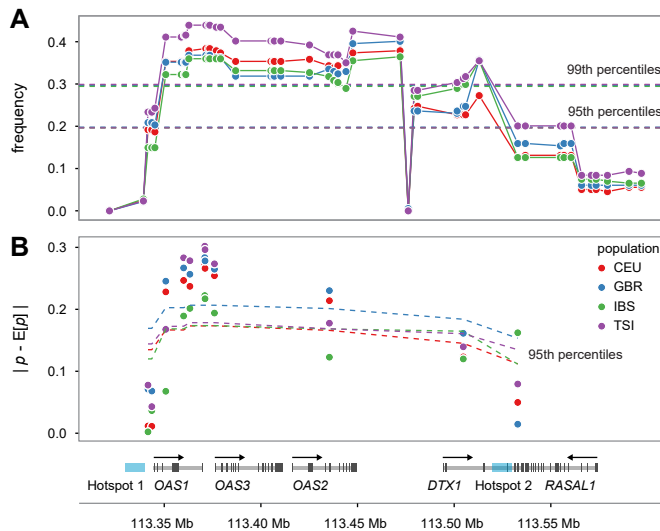

785

786 **Figure 2:** OAS-introgressed haplotypes are found at higher frequencies in

787 European populations than expected under neutrality. (A) Comparison of

788 frequency (y-axis) of NLS in the OAS locus in the CEU, GBR, IBS, and TSI

789 European population samples with respect to neutral expectations (dashed lines)

790 based on coalescent simulations. (B) Absolute difference between observed and

791 expected allele frequency in the same four present-day European samples (y-axis)

792 based on ancient DNA data. Dashed lines represent the 95<sup>th</sup> percentile of the

793 expected distribution based on similar deviations calculated on a dataset of

794 approximately one million SNPs scattered around the genome and with

795 comparable present-day frequencies to those found for NLS in the OAS region.

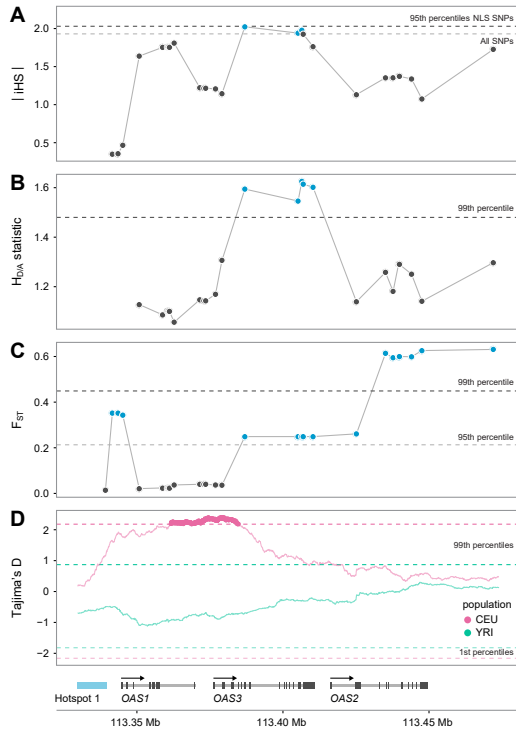

796

797 **Figure 3:** OAS-introgressed haplotypes show multiple signatures of positive  
798 selection. (A) Normalized absolute  $iHS$  scores (y-axis) across SNPs in the CEU  
799 sample. Dashed lines represent the 95<sup>th</sup> percentile of  $iHS$  calculated genome-wide  
800 across all SNPs (grey) and all NLS SNPs (black). (B) The  $H_{D/A}$  statistic in CEU (y-  
801 axis). Dashed line indicates the 99<sup>th</sup> percentile of  $H_{D/A}$  calculated across 1,000  
802 simulations. (C)  $F_{ST}$  calculated between CEU and all East Asian populations from  
803 the 1000 Genomes projects (y-axis). Dashed lines indicate the 95<sup>th</sup> (grey) and 99<sup>th</sup>  
804 (black) genome-wide percentiles of  $F_{ST}$ . Similar results are obtained when  
805 comparing any other European population against East Asians (Table S5). (D)  
806 Tajima's  $D$  (y-axis) calculated for CEU and YRI samples. Dashed lines indicate  
807 the 1<sup>st</sup> and 99<sup>th</sup> genome-wide percentiles of Tajima's  $D$ .

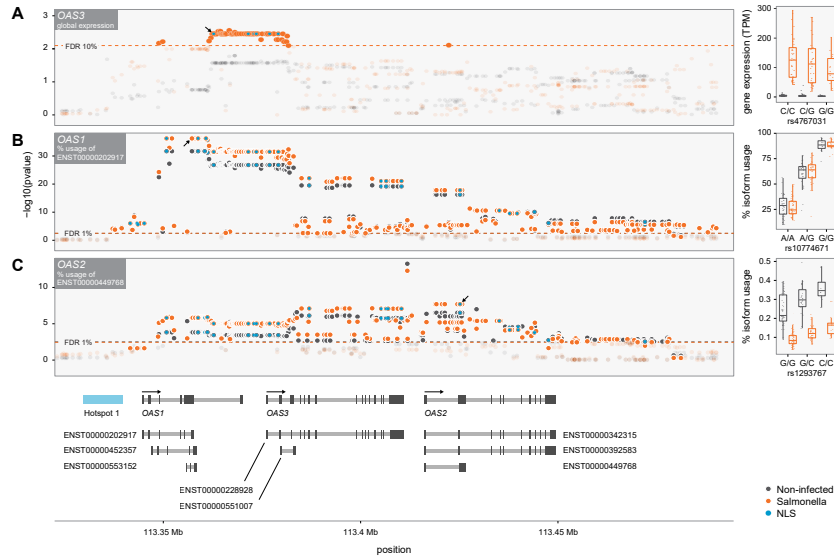

808

809 **Figure 4:** Pervasive impact of the Neandertal haplotype on the regulation of *OAS*

810 genes in primary macrophages. (A)  $-\log_{10} P$ s (y-axis) for the association between

811 genotypes for SNPs with a MAF > 10% in the *OAS* region and expression levels

812 of *OAS3* in non-infected (black) and *Salmonella*-infected macrophages (orange).

813 The dashed line shows the P cutoff corresponding to an FDR of 10%. The right

814 panel shows a boxplot for the association between genotypes at the NLS

815 rs4767031 (x-axis) and the expression levels of *OAS3* in TPM (Transcripts Per

816 Kilobase Million) (y-axis). The lower expression level of *OAS3* in individuals

817 harboring the Neandertal haplotype were confirmed by real-time PCR (Figure

818 S11) (B)  $-\log_{10} P$ s (y-axis) for the association between genotypes in the *OAS*

819 regions and the percentage usage of isoform ENST00000202917 (i.e., p46 in the

820 text) in non-infected (black) and *Salmonella*-infected macrophages (orange). The

821 dashed line shows the P cutoff corresponding to an FDR of 1%. The right panel

822 shows a boxplot for the association between genotypes at the splicing variant

823 rs10774671 (x-axis) and the percentage usage of isoform p46 (y-axis). (C) Similar

824 to (B) but for the percentage usage of isoform ENST00000449768 of OAS2. In all  
825 the panels NLS are highlighted by blue dots. The arrows on panel A-C highlight  
826 the location of the SNPs for which the boxplots are shown on the right.

827

828

829

830

831

832

833

834

835

836

837



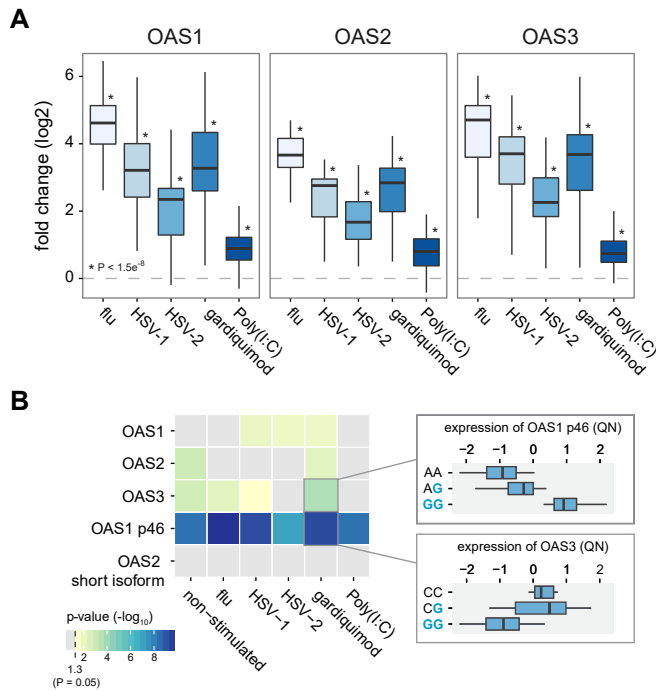

838

839 **Figure 5:** The Neandertal haplotype in the OAS regions has a different impact on

840 the regulation of OAS genes depending on the viral agents PBMCs are exposed to.

841 (A) Log 2 fold induction (y-axis) of *OAS1*, *OAS2* and *OAS3* in response to

842 different viral agents or viral-associated immune stimuli, relative to non-infected

843 PBMCs (B)  $-\log_{10} P$  for the association between genotype status for the

844 Neandertal haplotype and overall expression levels of OAS genes and the

845 expression of specific isoforms of *OAS1* and *OAS2* (those identified in Figure 3 as

846 associated with NLS). Boxplots show the association between genotype status

847 (blue referring to Neandertal alleles) and expression levels of the p46 isoform of

848 *OAS1* and *OAS3* in Gardiquimod-stimulated PBMCs.

849

850

851

852 **Supplementary Figures:**

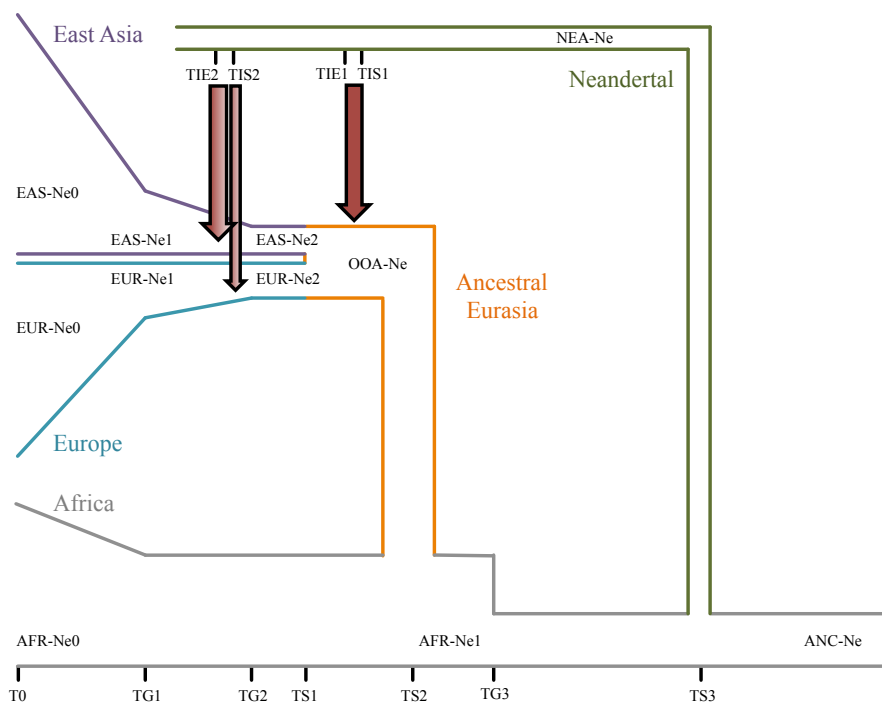

853

854 **Figure S1:** Schematic representation of demographic model used in simulations.

855 Red arrows indicate points of introgression. The full range of demographic

856 parameters used for the simulation can be found in Table S1.

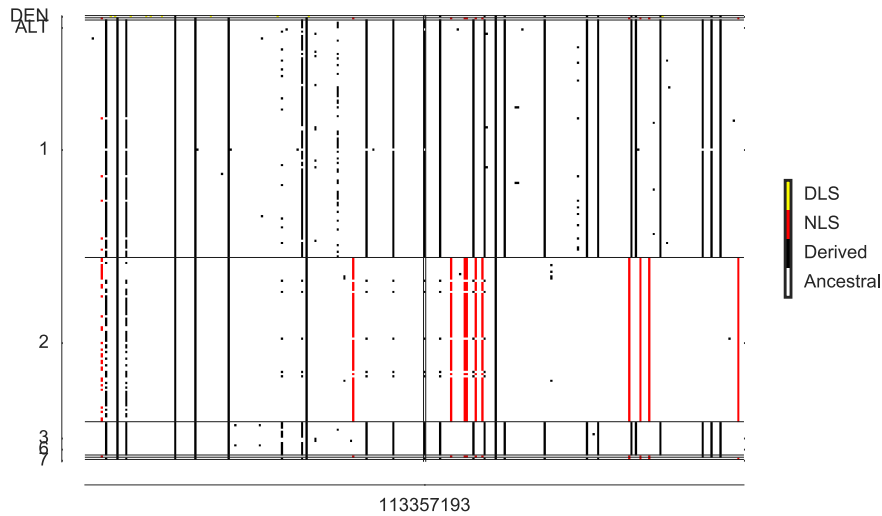

857

858 **Figure S2:** Haplogram of region surrounding *OAS1* splice site (rs10774671). 198

859 phased haplotypes from the CEU population sample are illustrated along with the

860 Altai and Denisovan haplotypes. Ancestral alleles are colored white, derived

861 alleles are (1) yellow if derived in Denisovan and absent from Africans (YRI)

862 (DLS), (2) red if derived in Neandertals and absent from Africans (YRI) (NLS),

863 (3) black otherwise. With the exception of two rare haplotypes in cluster 1, all

864 occurrences of the ancestral variant at rs10774671 are surrounded by derived

865 Neandertal alleles, indicating that these were introduced in a Neandertal

866 haplotype. Only sites where the Neandertal and Denisovan genomes are

867 homozygous were used in this haplogram. Cluster labels (y-axis) correspond to

868 clusters in Figure 1.

869

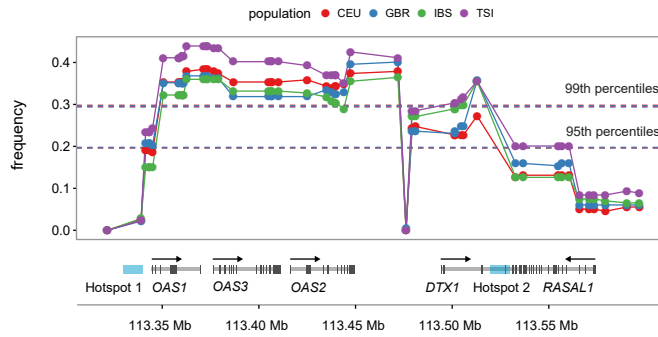

870

871 **Figure S3:** OAS-introgressed haplotypes are found at higher frequencies in

872 European populations than expected under neutrality when using a two-pulse

873 introgression model. (A) Comparison of frequency (y-axis) of NLS in the OAS

874 locus in the CEU, GBR, IBS, and TSI European population samples with respect

875 to neutral expectations (dashed lines) based on coalescent simulations considering

876 two-pulse introgression in both Europeans and Asians, or a second pulse of

877 introgression only in Europeans. Dashed lines overlap almost completely,

878 reflecting little variation between a two-pulse introgression in both European and

879 Asians, or a second pulse only in Europeans.

880

881

882

883

884

885

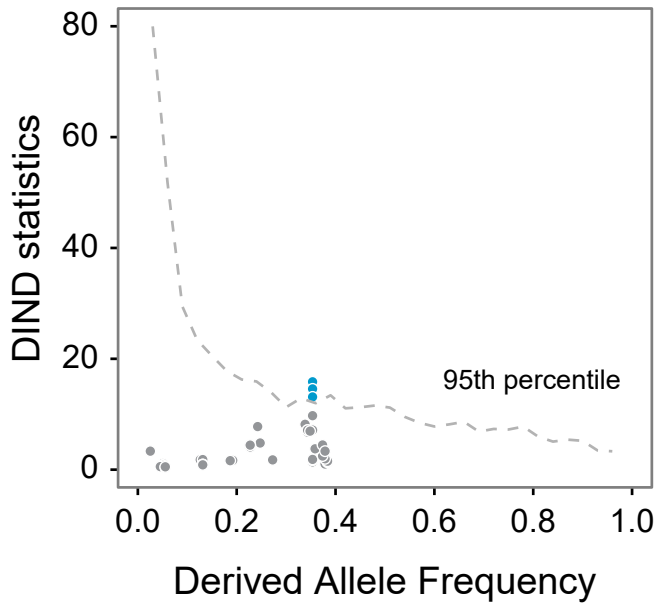

886

887 **Figure S4:** The DIND statistic indicates reduced diversity surrounding NLS.

888 DIND (y-axis) is plotted for SNPs in OAS locus by derived (Neandertal) allele

889 frequency. Dashed line indicates genome-wide 95<sup>th</sup> percentile by frequency.

890

891

892

893

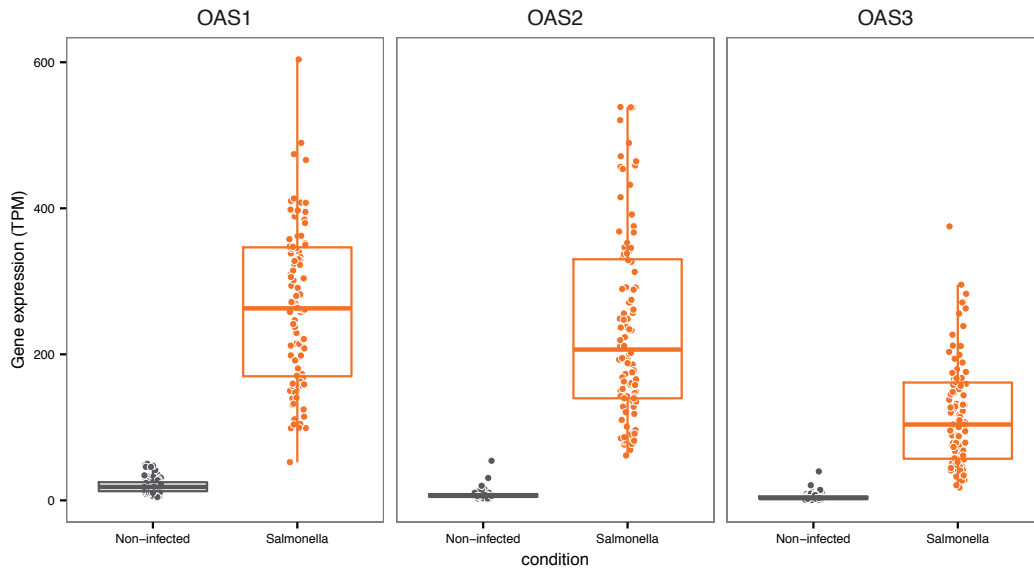

894

895 **Figure S5:** Expression levels of OAS genes in primary macrophages (European)

896 before and after infection with Salmonella.

897

898

899

900

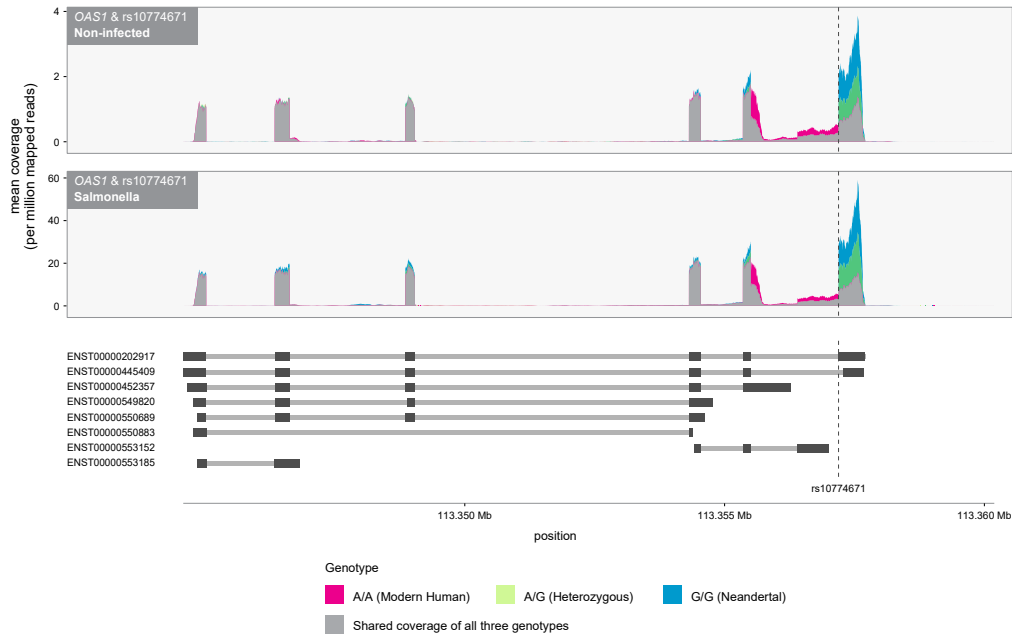

901

902 **Figure S6:** The splicing variant rs10774671 is a strong asQTL for *OAS1*. Plotted  
903 is the normalized average coverage at which each base was sequenced along the  
904 genomic regions encoding the gene *OAS1*. Individuals were stratified according to  
905 their genotype at rs10774671. Below the figure are gene models from the Ensembl  
906 database. Individuals carrying the G allele at rs10774671 (i.e. the Neandertal  
907 allele) primarily express the transcript ENST00000202917 (referred to as p46 in  
908 the text) whereas individuals carrying the A derived allele lose the splice site,  
909 which leads to the usage of a distinct isoform.

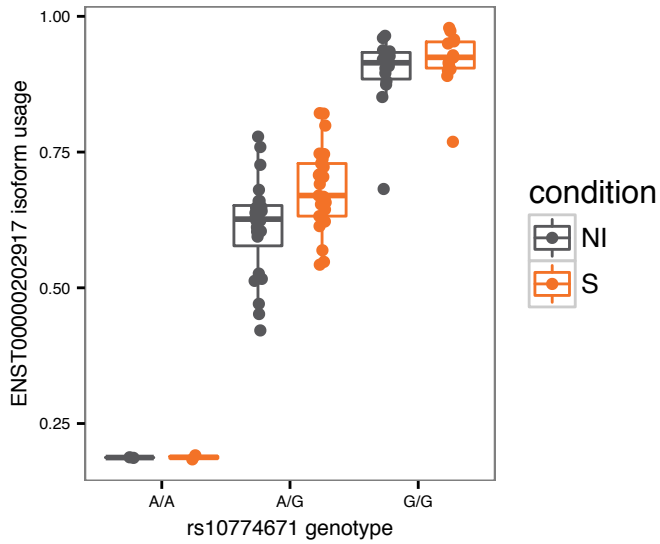

910

911 **Figure S7:** Isoform usage for transcript ENST00000202917 stratified by

912 genotype at rs10774671 in cells derived from individuals with African ancestry.

913 The derived (Neandertal) allele leads to increased expression of

914 ENST00000202917 in both non-infected and *Salmonella* infected conditions.

915

916

917

918



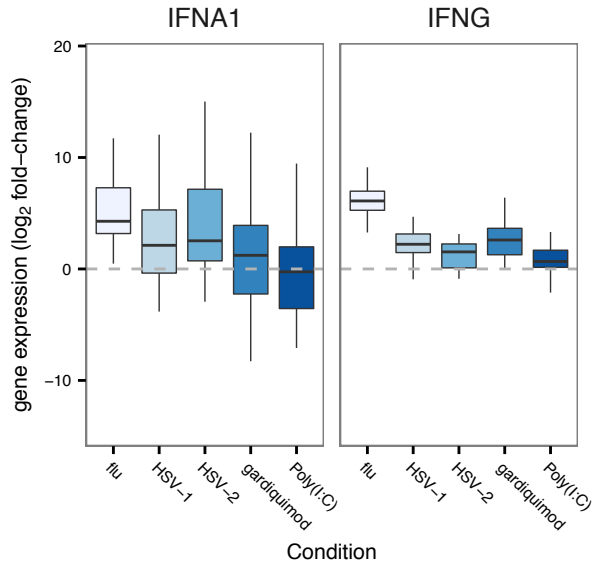

919

920 **Figure S8:** Log 2 fold induction (y-axis) of IFNA1 (type 1 interferon) and IFNG

921 (type II interferon) in PBMCs upon stimulation with several viral agents.

922

923

924

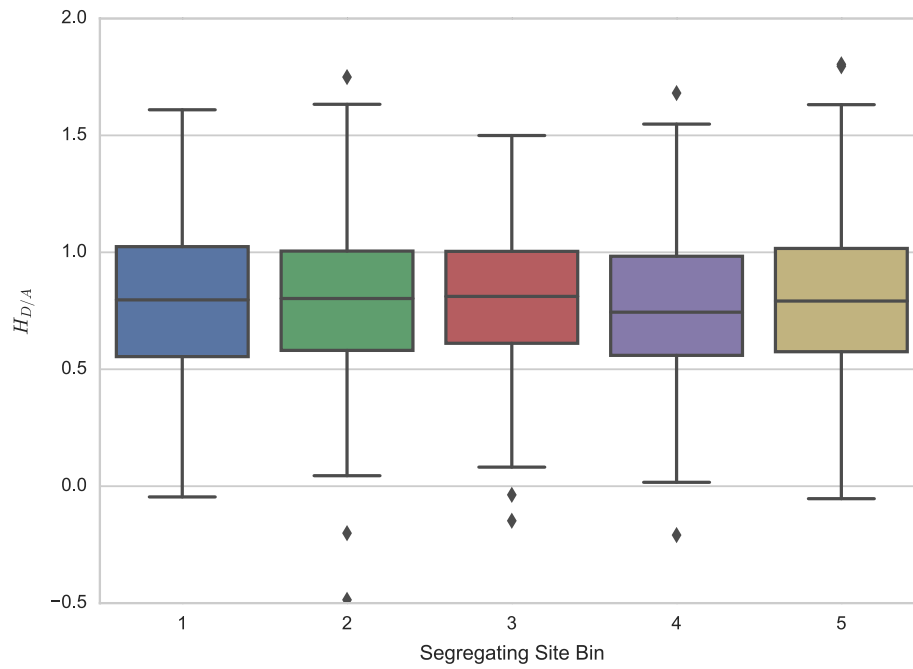

925

926 **Figure S9:**  $H_{D/A}$  plotted against quintiles of segregating sites in 1,000 simulations.

927 The  $H_{D/A}$  statistic does vary with number of segregating sites across simulated data.

928

929

930

931

932

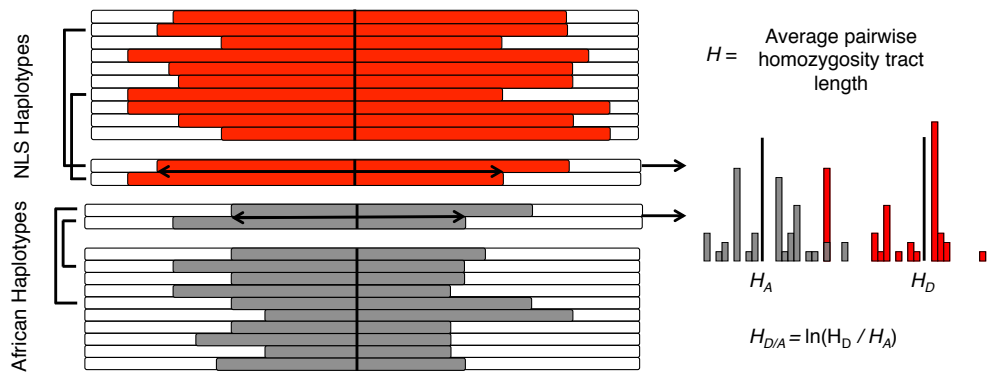

933

934 **Figure S10:** Schematic illustration of the  $H_{D/A}$  statistic. At each NLS, haplotypes  
935 are divided into two groups, based on whether they carry the Neandertal (derived)  
936 or African (ancestral) state. Within each haplotype subset, haplotype  
937 homozygosity is calculated across all pairs of haplotypes and then averaged ( $H$ ),  
938 resulting in two values;  $H_A$  and  $H_D$  (A-ancestral, D-derived). Finally,  $H_{D/A}$  is  
939 calculated as the natural log of the ratio of derived to ancestral  $H$  values.  
940 Excessively high values of this statistic reflect particularly long haplotypes  
941 carrying Neandertal-derived alleles.

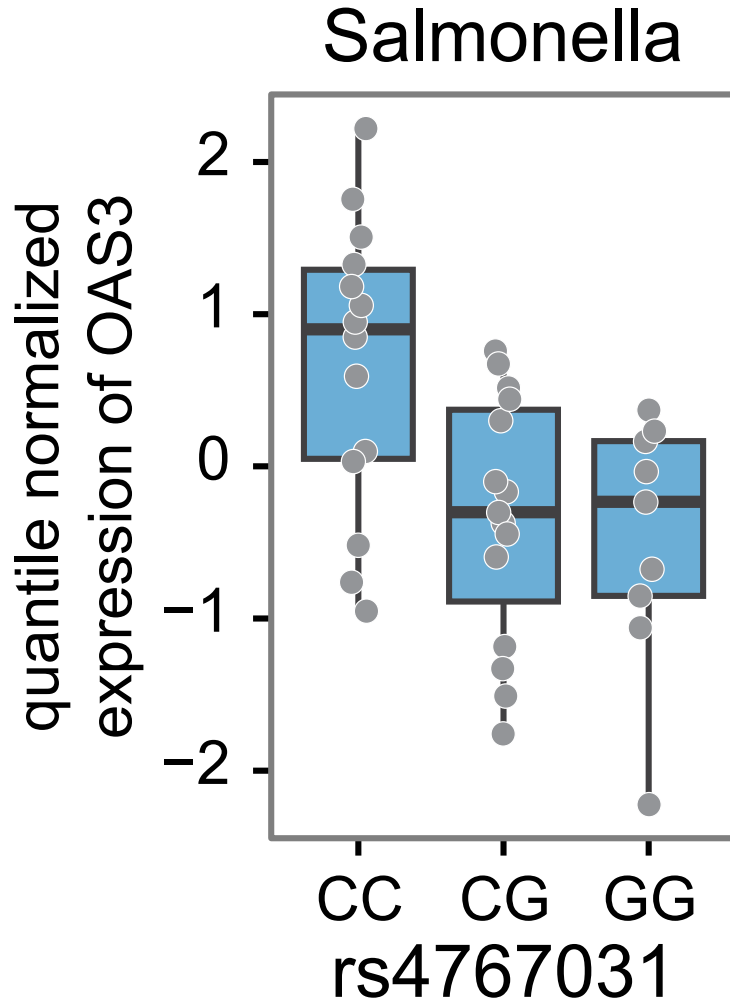

942

943 **Figure S11:** Boxplot for the association between genotypes at the NLS rs4767031

944 (x-axis) and the expression levels of *OAS3* in *Salmonella*-infected macrophages

945 using real-time PCR.

946

947

948 **References:**

- 949 1. Green RE, Krause J, Briggs AW, Maricic T, Stenzel U, Kircher M, et al. A draft  
950 sequence of the Neandertal genome. *Science*. American Association for the  
951 Advancement of Science; 2010;328:710–22.
- 952 2. Reich D, Green RE, Kircher M, Krause J, Patterson N, Durand EY, et al.  
953 Genetic history of an archaic hominin group from Denisova Cave in Siberia.  
954 *Nature*. Nature Publishing Group; 2010;468:1053–60.
- 955 3. Meyer M, Kircher M, Gansauge MT, Li H, Racimo F, Mallick S, et al. A high-  
956 coverage genome sequence from an archaic denisovan individual. *Science*.  
957 American Association for the Advancement of Science; 2012;338:222–6.
- 958 4. Prüfer K, Racimo F, Patterson N, Jay F, Sankararaman S, Sawyer S, et al. The  
959 complete genome sequence of a Neanderthal from the Altai Mountains. *Nature*.  
960 2014;505:43–9.
- 961 5. Sawyer S, Renaud G, Viola B, Hublin J-J, Gansauge M-T, Shunkov MV, et al.  
962 Nuclear and mitochondrial DNA sequences from two Denisovan individuals.  
963 *Proceedings of the National Academy of Sciences*. National Acad Sciences;  
964 2015;:201519905.
- 965 6. Sankararaman S, Mallick S, Dannemann M, Prüfer K, Kelso J, Pääbo S, et al.  
966 The genomic landscape of Neanderthal ancestry in present-day humans. *Nature*.  
967 2014;507:354–7.
- 968 7. Llorente MG, Jones ER, Eriksson A, Siska V, Arthur KW, Arthur JW, et al.  
969 Ancient Ethiopian genome reveals extensive Eurasian admixture throughout the  
970 African continent. *Science*. 2015.
- 971 8. Vernot B, Akey JM. Resurrecting surviving Neandertal lineages from modern  
972 human genomes. *Science*. 2014;343:1021.
- 973 9. Harris K, Nielsen R. The Genetic Cost of Neanderthal Introgression. *Genetics*.  
974 *Genetics*; 2016;:genetics.116.186890.
- 975 10. Racimo F, Sankararaman S, Nielsen R, Huerta-Sanchez E. Evidence for  
976 archaic adaptive introgression in humans. *Nat Rev Genet*. Nature Publishing  
977 Group; 2015.
- 978 11. Racimo F, Marnetto D, Huerta-Sanchez E. The landscape of uniquely shared  
979 archaic alleles in present-day human populations. *bioRxiv*. Cold Spring Harbor  
980 Labs Journals; 2016;:045237.
- 981 12. Hublin JJ. The origin of Neandertals. *Proceedings of the National Academy of*

- 982 Sciences. 2009;106:16022–7.
- 983 13. Ségurel L, Quintana-Murci L. Preserving immune diversity through ancient  
984 inheritance and admixture. *Curr. Opin. Immunol.* 2014;30C:79–84.
- 985 14. Mendez FL, Watkins JC, Hammer MF. A Haplotype at STAT2 Introgressed  
986 from Neanderthals and Serves as a Candidate of Positive Selection in Papua New  
987 Guinea. *The American Journal of Human Genetics.* Elsevier; 2012;91:265–74.
- 988 15. Mendez FL, Watkins JC, Hammer MF. Neandertal origin of genetic variation  
989 at the cluster of OAS immunity genes. *Molecular Biology and Evolution.* Oxford  
990 University Press; 2013;30:798–801.
- 991 16. Player MR, Torrence PF. The 2–5 A system: Modulation of viral and cellular  
992 processes through acceleration of RNA degradation. *Pharmacology &*  
993 *Therapeutics.* 1998;78:55–113.
- 994 17. Mendez FL, Watkins JC, Hammer MF. Global genetic variation at OAS1  
995 provides evidence of archaic admixture in Melanesian populations. *Molecular*  
996 *Biology and Evolution.* 2012;29:1513–20.
- 997 18. Deschamps M, Laval G, Fagny M, Itan Y, Abel L, Casanova J-L, et al.  
998 Genomic Signatures of Selective Pressures and Introgression from Archaic  
999 Hominins at Human Innate Immunity Genes. *American Journal of Human*  
1000 *Genetics.* 2016;98:5–21.
- 1001 19. Sankararaman S, Mallick S, Patterson N, Reich D. The Combined Landscape  
1002 of Denisovan and Neanderthal Ancestry in Present-Day Humans. *Current Biology.*  
1003 2016.
- 1004 20. Consortium T1GP. A global reference for human genetic variation. *Nature.*  
1005 Nature Publishing Group; 2015;526:68–74.
- 1006 21. Fu Q, Li H, Moorjani P, Jay F, Slepchenko SM, Bondarev AA, et al. Genome  
1007 sequence of a 45,000-year-old modern human from western Siberia. *Nature.*  
1008 2014;514:445–9.
- 1009 22. Yang MA, Malaspinas AS, Durand EY, Slatkin M. Ancient structure in Africa  
1010 unlikely to explain Neanderthal and non-African genetic similarity. *Molecular*  
1011 *Biology and Evolution.* *SMBE;* 2012;29:2987–95.
- 1012 23. Gravel S, Henn BM, Gutenkunst RN, Indap AR, Marth GT, Clark AG, et al.  
1013 Demographic history and rare allele sharing among human populations.  
1014 *Proceedings of the National Academy of Sciences of the United States of America.*  
1015 *National Acad Sciences;* 2011;108:11983–8.
- 1016 24. Tennessen JA, Bigham AW, O'Connor TD, Fu W, Kenny EE, Gravel S, et al.  
1017 Evolution and Functional Impact of Rare Coding Variation from Deep Sequencing

- 1018 of Human Exomes. *Science*. 2012;337:64–9.
- 1019 25. Vernot B, Akey JM. Complex History of Admixture between Modern Humans  
1020 and Neandertals. *The American Journal of Human Genetics*. 2015.
- 1021 26. Mathieson I, Lazaridis I, Rohland N, Mallick S, Patterson N, Roodenberg SA,  
1022 et al. Genome-wide patterns of selection in 230 ancient Eurasians. *Nature*. 2015.
- 1023 27. Lazaridis I, Patterson N, Mittnik A, Renaud G, Mallick S, Kirsanow K, et al.  
1024 Ancient human genomes suggest three ancestral populations for present-day  
1025 Europeans. *Nature*. Nature Publishing Group; 2014;513:409–13.
- 1026 28. Voight BF, Kudravalli S, Wen X, Pritchard JK. A map of recent positive  
1027 selection in the human genome. *Plos Biology*. Public Library of Science;  
1028 2006;4:e72.
- 1029 29. Barreiro LB, Ben-Ali M, Quach H, Laval G, Patin E, Pickrell JK, et al.  
1030 Evolutionary dynamics of human Toll-like receptors and their different  
1031 contributions to host defense. Mcvean G, editor. *PLoS Genetics*. Public Library of  
1032 Science; 2009;5:e1000562.
- 1033 30. Sabeti, P.C., Reich DE, Higgins JM, Levine HZP, Richter DJ, Schaffner SF, et  
1034 al. Detecting recent positive selection in the human genome from haplotype  
1035 structure. *Nature*. Nature Publishing Group; 2002;419:832–7.
- 1036 31. Nauciel C, Espinasse-Maes F. Role of Gamma Interferon and Tumor-Necrosis-  
1037 Factor-Alpha in Resistance to Salmonella-Typhimurium Infection. *Infect. Immun.*  
1038 *American Society for Microbiology*; 1992;60:450–4.
- 1039 32. Gulig PA, Doyle TJ, Clare-Salzler MJ, Maiese RL, Matsui H. Systemic  
1040 infection of mice by wild-type but not Spv- *Salmonella typhimurium* is enhanced  
1041 by neutralization of gamma interferon and tumor necrosis factor alpha. *Infect.*  
1042 *Immun. American Society for Microbiology (ASM)*; 1997;65:5191–7.
- 1043 33. LaRock DL, Chaudhary A, Miller SI. Salmonellae interactions with host  
1044 processes. *Nat Rev Micro*. 2015;13:191–205.
- 1045 34. Wu L, Candille SI, Choi Y, Xie D, Jiang L. Variation and genetic control of  
1046 protein abundance in humans. *Nature*. 2013;499:79–82.
- 1047 35. Pickrell JK, Marioni JC, Pai AA, Degner JF. Understanding mechanisms  
1048 underlying human gene expression variation with RNA sequencing. *Nature*.  
1049 2010;464:768–72.
- 1050 36. Bonnevie-Nielsen V, Field LL, Lu S, Zheng D-J, Li M, Martensen PM, et al.  
1051 Variation in antiviral 2',5'-oligoadenylate synthetase (2"5"AS) enzyme activity is  
1052 controlled by a single-nucleotide polymorphism at a splice-acceptor site in the  
1053 OAS1 gene. *The American Journal of Human Genetics*. 2005;76:623–33.

- 1054 37. Meyer M, Arsuaga JL, de Filippo C, Nagel S, Aximu-Petri A, Nickel B, et al.  
1055 Nuclear DNA sequences from the Middle Pleistocene Sima de los Huesos  
1056 hominins. *Nature*. 2016.
- 1057 38. Lim JK, Lisco A, McDermott DH, Huynh L, Ward JM, Johnson B, et al.  
1058 Genetic Variation in OAS1 Is a Risk Factor for Initial Infection with West Nile  
1059 Virus in Man. Rice CM, editor. *PLoS Pathog*. Public Library of Science;  
1060 2009;5:e1000321.
- 1061 39. Bigham AW, Buckingham KJ, Husain S, Emond MJ, Bofferding KM,  
1062 Gildersleeve H, et al. Host Genetic Risk Factors for West Nile Virus Infection and  
1063 Disease Progression. Ravichandran V, editor. *PLoS ONE*. Public Library of  
1064 Science; 2011;6:e24745.
- 1065 40. Kwon Y-C, Kang J-I, Hwang SB, Ahn B-Y. The ribonuclease l-dependent  
1066 antiviral roles of human 2',5'-oligoadenylate synthetase family members against  
1067 hepatitis C virus. *FEBS Letters*. 2012;587:156–64.
- 1068 41. Awady El MK, Anany MA, Esmat G, Zayed N, Tabll AA, Helmy A, et al.  
1069 Single nucleotide polymorphism at exon 7 splice acceptor site of OAS1 gene  
1070 determines response of hepatitis C virus patients to interferon therapy. *Journal of*  
1071 *Gastroenterology and Hepatology*. Blackwell Publishing Asia; 2011;26:843–50.
- 1072 42. Barreiro LB, Quintana-Murci LIS. From evolutionary genetics to human  
1073 immunology: how selection shapes host defence genes. *Nat Rev Genet*. Nature  
1074 Publishing Group; 2010;11:17–30.
- 1075 43. Hancks DC, Hartley MK, Hagan C, Clark NL, Elde NC. Overlapping Patterns  
1076 of Rapid Evolution in the Nucleic Acid Sensors cGAS and OAS1 Suggest a  
1077 Common Mechanism of Pathogen Antagonism and Escape. Zhang J, editor. *PLoS*  
1078 *Genetics*. Public Library of Science; 2015;11:e1005203.
- 1079 44. Kent WJ, Sugnet CW, Furey TS, Roskin KM, Pringle TH, Zahler AM, et al.  
1080 The human genome browser at UCSC. *Genome Research*. Cold Spring Harbor  
1081 Lab; 2002;12:996–1006.
- 1082 45. Hudson R. Generating samples under a Wright–Fisher neutral model of genetic  
1083 variation. *Bioinformatics*. 2002.
- 1084 46. Chen GK, Marjoram P, Wall JD. Fast and flexible simulation of DNA  
1085 sequence data. *Genome Research*. 2009;19:136–42.
- 1086 47. Schlamp F, Made J, Stambler R, Chesebrough L, Boyko AR, Messer PW.  
1087 Evaluating the performance of selection scans to detect selective sweeps in  
1088 domestic dogs. *Mol Ecol*. 2016;25:342–56.
- 1089 48. Ferrer-Admetlla A, Liang M, Korneliussen T, Nielsen R. On detecting  
1090 incomplete soft or hard selective sweeps using haplotype structure. *Molecular*



- 1091 Biology and Evolution. Oxford University Press; 2014;31:1275–91.
- 1092 49. Huerta-Sanchez E, Jin X, Asan, Bianba Z, Peter BM, Vinckenbosch N, et al.  
1093 Altitude adaptation in Tibetans caused by introgression of Denisovan-like DNA.  
1094 Nature. 2014;512:194–7.
- 1095 50. Excoffier L, Lischer HEL. Arlequin suite ver 3.5: a new series of programs to  
1096 perform population genetics analyses under Linux and Windows. Molecular  
1097 Ecology Resources. Blackwell Publishing Ltd; 2010;10:564–7.
- 1098 51. Maclean CA, Chue Hong NP, Prendergast JGD. hapbin: An Efficient Program  
1099 for Performing Haplotype-Based Scans for Positive Selection in Large Genomic  
1100 Datasets. Molecular Biology and Evolution. Oxford University Press;  
1101 2015;32:3027–9.
- 1102 52. Alexander DH, Novembre J, Lange K. Fast model-based estimation of  
1103 ancestry in unrelated individuals. Genome Research. Cold Spring Harbor Lab;  
1104 2009;19:1655–64.
- 1105 53. Howie BN, Donnelly P, Marchini J. A Flexible and Accurate Genotype  
1106 Imputation Method for the Next Generation of Genome-Wide Association Studies.  
1107 Schork NJ, editor. PLoS Genetics. Public Library of Science; 2009;5:e1000529.
- 1108 54. Storey JD, Tibshirani R. Statistical significance for genomewide studies.  
1109 Proceedings of the National Academy of Sciences of the United States of America.  
1110 National Acad Sciences; 2003;100:9440–5.
- 1111
